# Supplementary material for: Development of novel ruthenium(ii)–arene complexes displaying potent anticancer effects in glioblastoma cells
Source: Royal Society of Chemistry journal article supplement (doi:10.1039/d0dt02167a), 2020-01-01
Supplement: d0dt02167a1.pdf [file d0dt02167a1.pdf]

## **Electronic Supplementary Information (ESI)**

### **Development of novel ruthenium(II)-arene complexes displaying potent anticancer effects in glioblastoma cells**

Priyaranjan Kumar,<sup>a</sup> Indranil Mondal,<sup>b</sup> Ritu Kulshreshtha,<sup>b</sup> and Ashis K. Patra<sup>\*,a</sup>

---

Author address: <sup>a</sup> Department of Chemistry, Indian Institute of Technology Kanpur, Kanpur  
208016, Uttar Pradesh, India

<sup>b</sup> Department of Biochemical Engineering and Biotechnology, Indian Institute of Technology  
Delhi, Hauz Khas, New Delhi 110 016, India

| <b><u>Supporting information contents</u></b>                                                            | <b><u>Page</u></b> |
|----------------------------------------------------------------------------------------------------------|--------------------|
| <b>Figure S1.</b> ESI–MS analysis of complexes <b>1</b> and <b>2</b> .                                   | <b>3</b>           |
| <b>Figure S2.</b> Solid-state FTIR overlay (in KBr pellets) for complexes <b>1</b> and <b>2</b> .        | <b>4</b>           |
| <b>Figure S3.</b> <sup>1</sup> H NMR of complex <b>1</b> .                                               | <b>5</b>           |
| <b>Figure S4.</b> <sup>13</sup> C NMR of complex <b>1</b> .                                              | <b>6</b>           |
| <b>Figure S5.</b> <sup>1</sup> H NMR of complex <b>2</b> .                                               | <b>7</b>           |
| <b>Figure S6.</b> <sup>13</sup> C NMR of complex <b>2</b> .                                              | <b>8</b>           |
| <b>Figure S7.</b> An ORTEP view presentation of ligand (L2) and unit cell diagram.                       | <b>9</b>           |
| <b>Figure S8.</b> Unit cell diagram of complexes <b>1</b> and <b>2</b> .                                 | <b>10</b>          |
| <b>Table S1.</b> The crystallographic refinement parameters for L2 and complexes <b>1</b> and <b>2</b> . | <b>11</b>          |
| <b>Table S2.</b> The selected bond lengths and bond angles for the complexes <b>1</b> and <b>2</b> .     | <b>12-13</b>       |
| <b>Figure S9.</b> The dihedral angles in ligand L2 and complexes <b>1</b> and <b>2</b> .                 | <b>14</b>          |
| <b>Figure S10.</b> Intermolecular $\pi$ – $\pi$ stacking interactions from X-ray diffraction.            | <b>15</b>          |
| <b>Figure S11.</b> Aquation and kinetics of complex <b>2</b> in the buffer.                              | <b>16</b>          |
| <b>Figure S12.</b> Solvation and kinetics of complexes <b>1</b> and <b>2</b> in DMF.                     | <b>17</b>          |
| <b>Figure S13.</b> Time-dependent fluorescence changes of complex <b>2</b> in the buffer.                | <b>18</b>          |
| <b>Table S3.</b> The kinetics of photoreactivity of complexes <b>1</b> and <b>2</b> .                    | <b>18</b>          |
| <b>Figure S14.</b> Calf-thymus (CT) DNA binding studies of complex <b>2</b> .                            | <b>19</b>          |
| <b>Figure S15.</b> Ethidium bromide displacement assay of complex <b>2</b> .                             | <b>20</b>          |
| <b>Figure S16.</b> Circular dichroism study of CT-DNA binding of complexes <b>1</b> and <b>2</b> .       | <b>20</b>          |
| <b>Figure S17.</b> Fluorescence emission quenching of HSA upon complex <b>2</b> additions.               | <b>21</b>          |
| <b>Figure S18.</b> Synchronous fluorescence measurement of HSA upon complex <b>2</b> additions.          | <b>21</b>          |

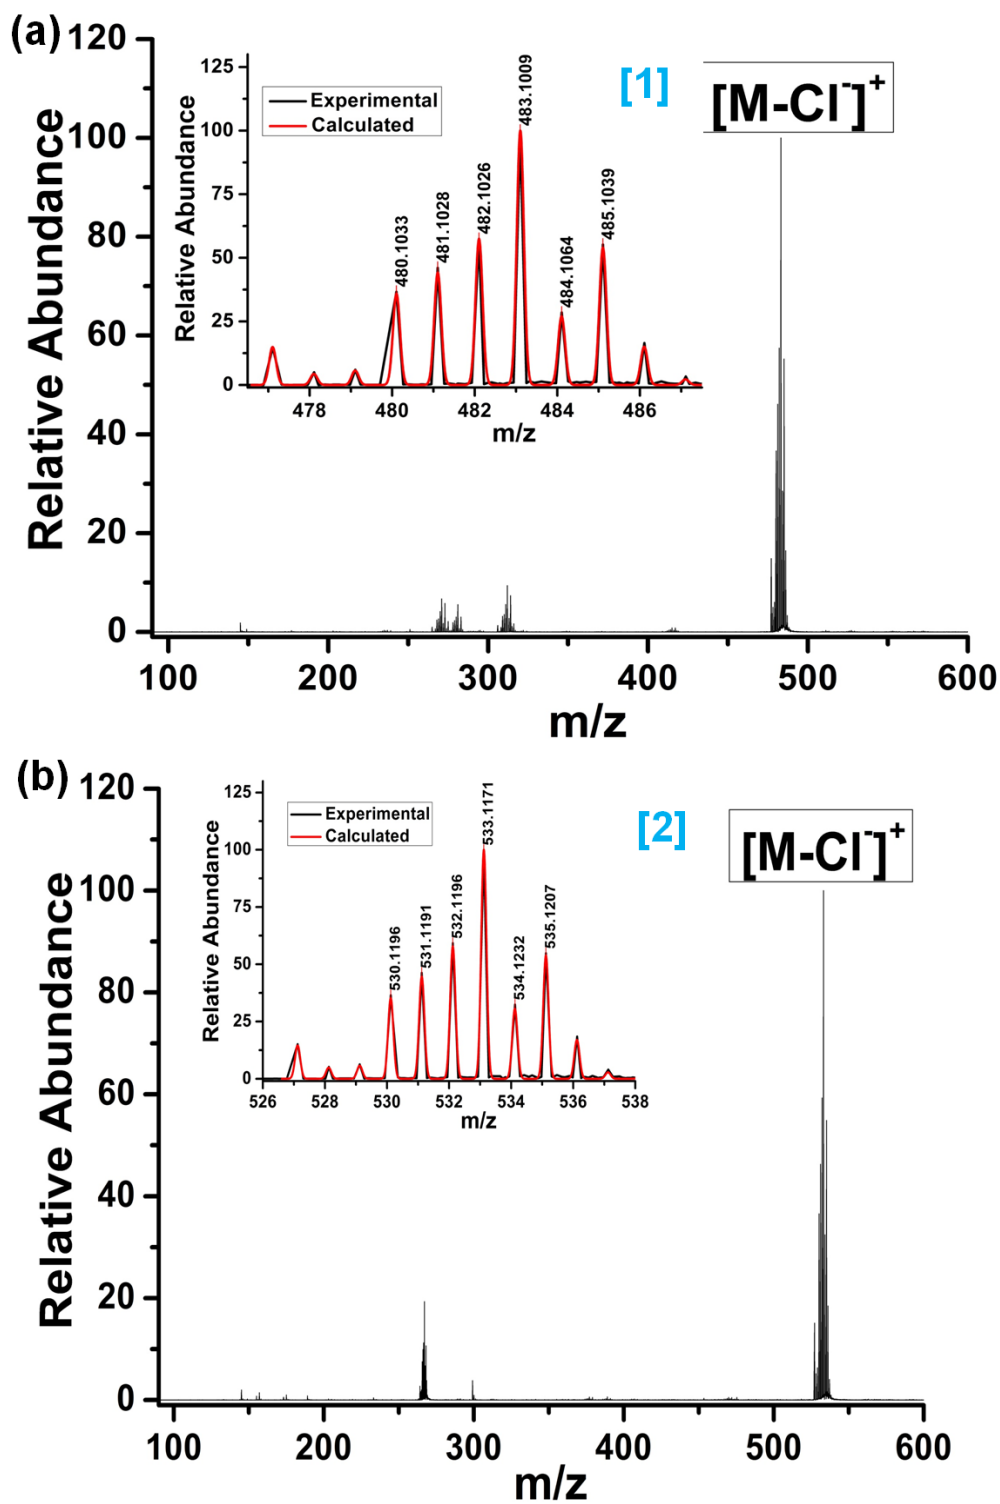

**Figure S1.** The positive ion mode ESI-MS analysis of the complexes (a) **1** showed  $[M-Cl]^{+}$  and (b) **2** showed  $[M-Cl]^{+}$  molecular ion peaks corresponding to the molecular mass  $M$ . Inset: The overlay of the theoretical and experimental isotopic distribution patterns of the molecular ions.

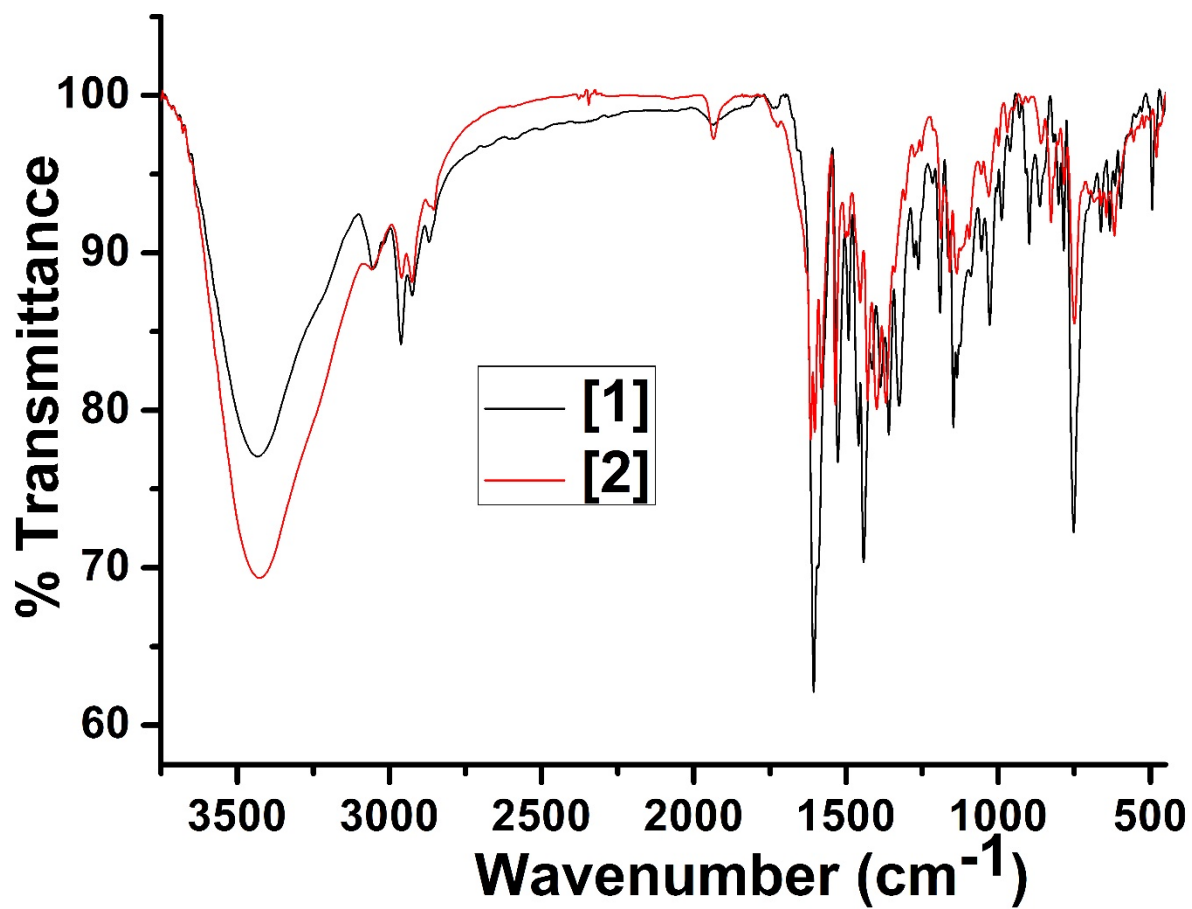

Figure S2. An overlay of the solid-state FTIR spectra of complexes 1 and 2 in KBr pellets.

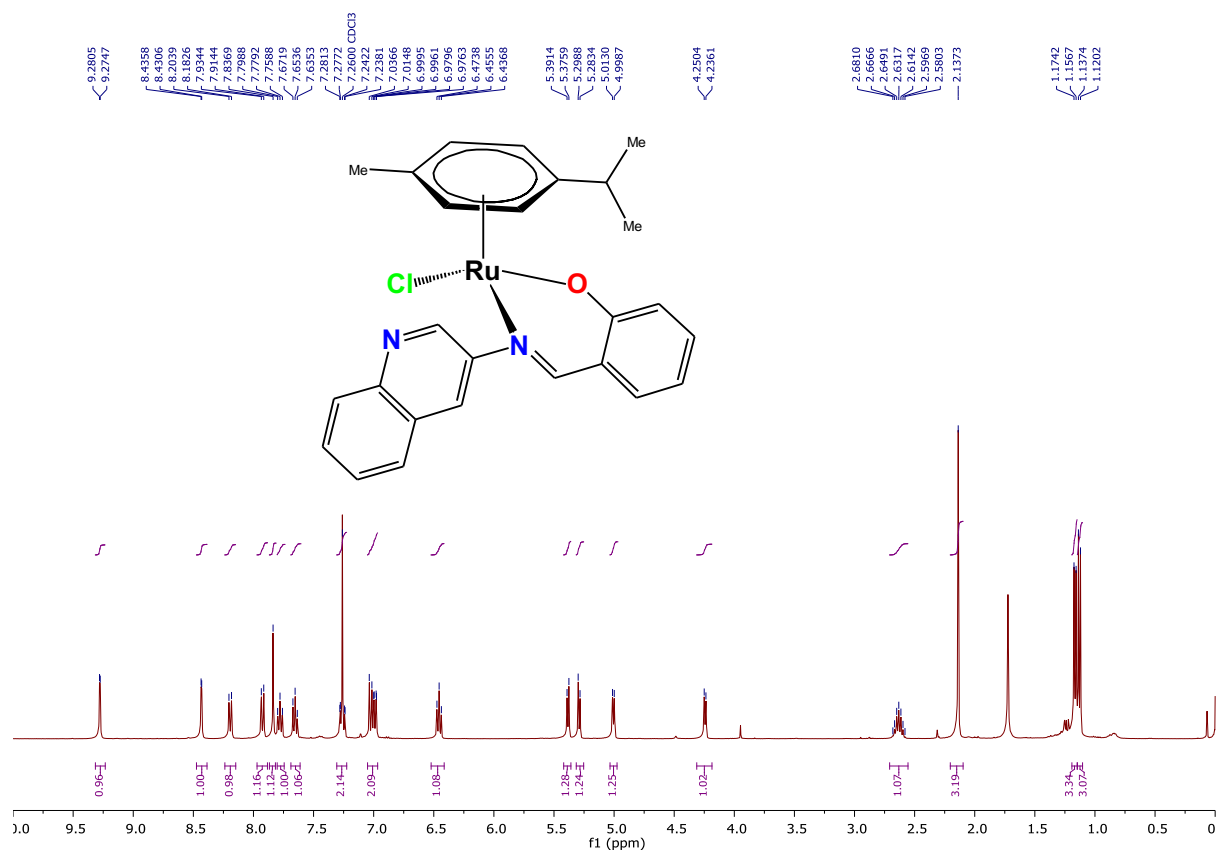

**Figure S3.** <sup>1</sup>H-NMR spectra of complex [Ru(η<sup>6</sup>-p-cymene)(L1)Cl] (**1**) in CDCl<sub>3</sub> (referenced with CDCl<sub>3</sub> signal at 7.26 ppm) at 298 K.

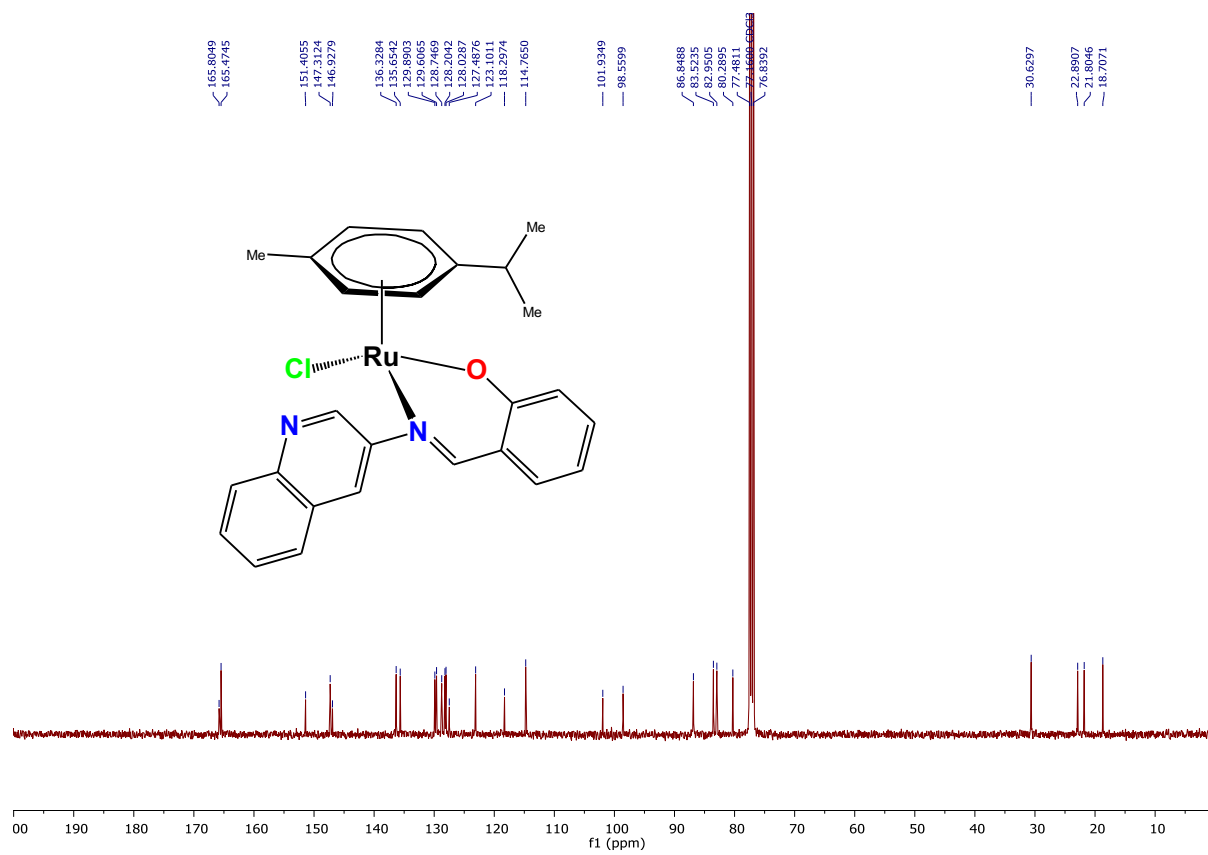

**Figure S4.**  $^{13}\text{C}$  NMR spectra of  $[\text{Ru}(\eta^6\text{-}p\text{-cymene})(\text{L1})\text{Cl}]$  (1) in  $\text{CDCl}_3$  at 298 K.

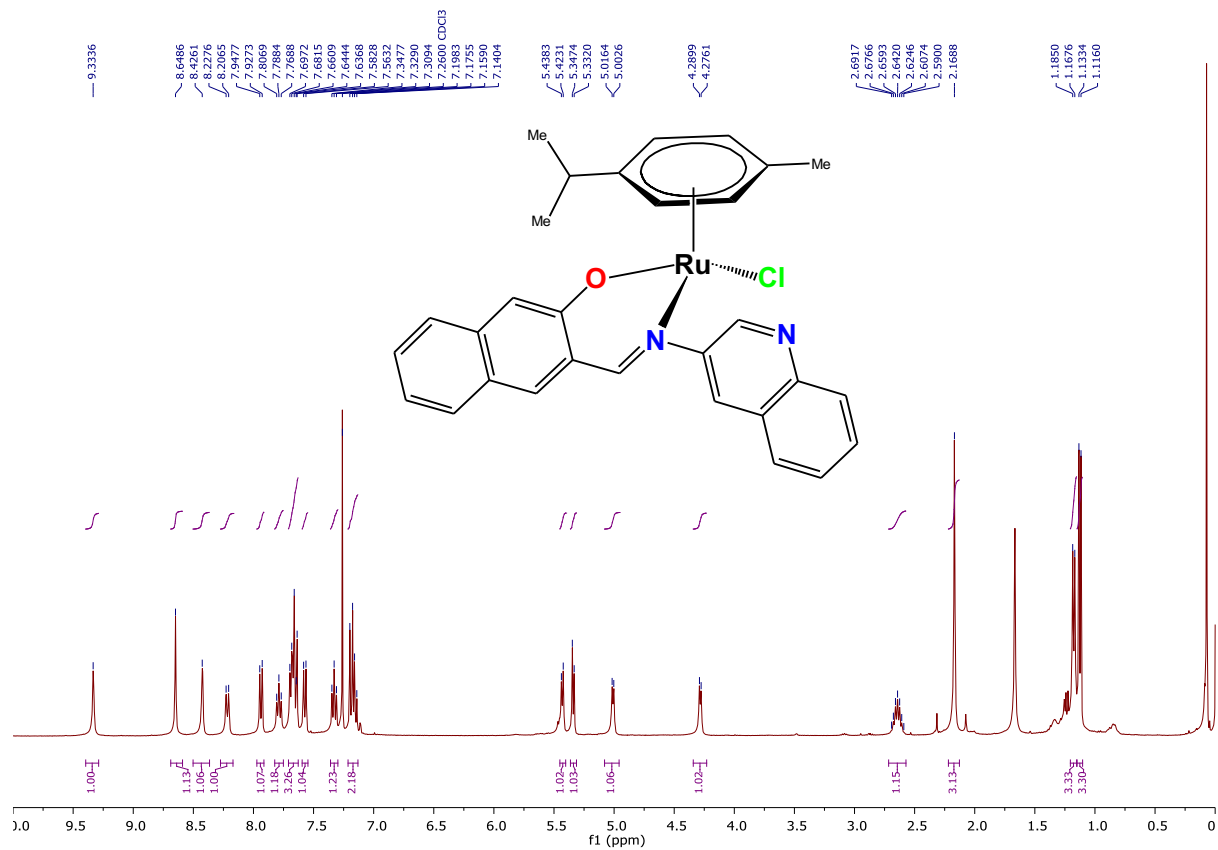

**Figure S5.** <sup>1</sup>H NMR spectra of complex [Ru(η<sup>6</sup>-*p*-cymene)(L<sub>2</sub>)Cl] (2) in CDCl<sub>3</sub> (referenced with CDCl<sub>3</sub> signal at 7.26 ppm) at 298 K.

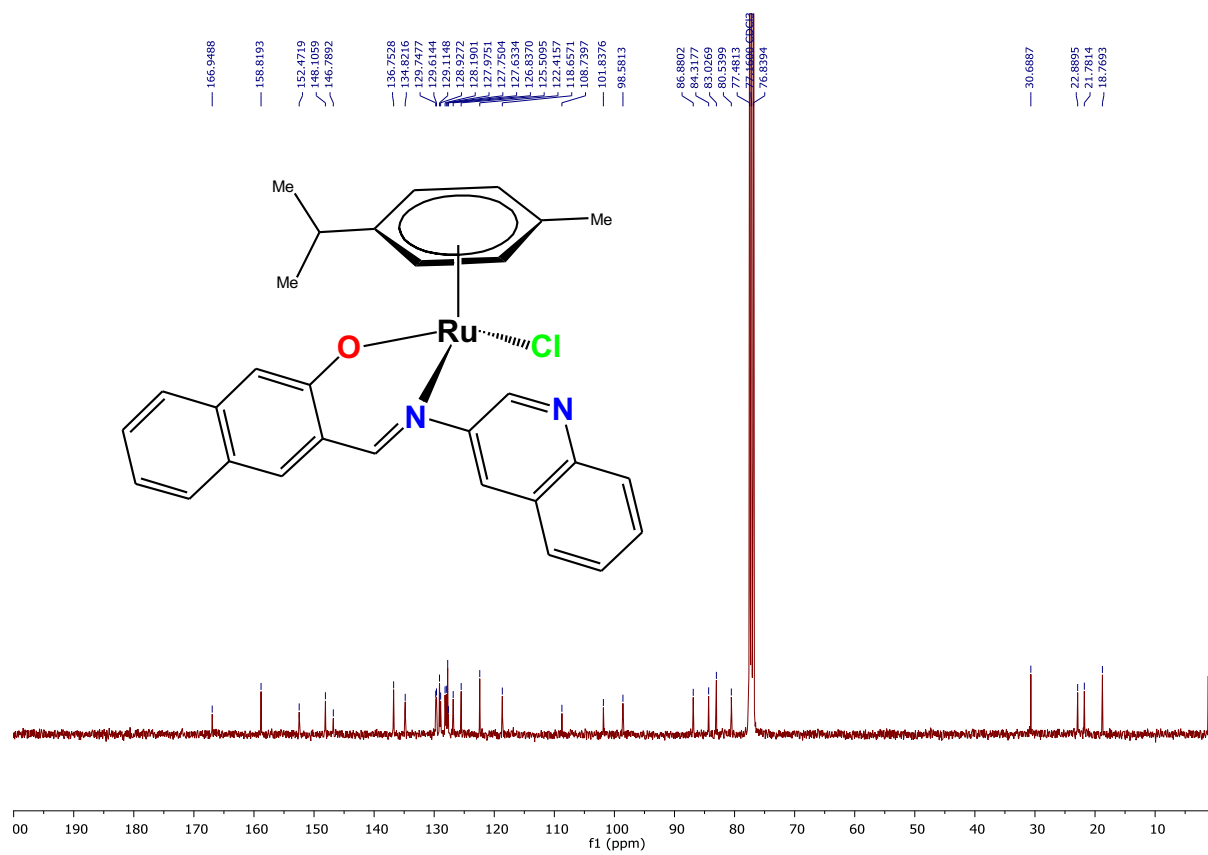

**Figure S6.**  $^{13}\text{C}$  NMR spectra of  $[\text{Ru}(\eta^6\text{-}p\text{-cymene})(\text{L}2)\text{Cl}]$  (2) in  $\text{CDCl}_3$  at 298 K.



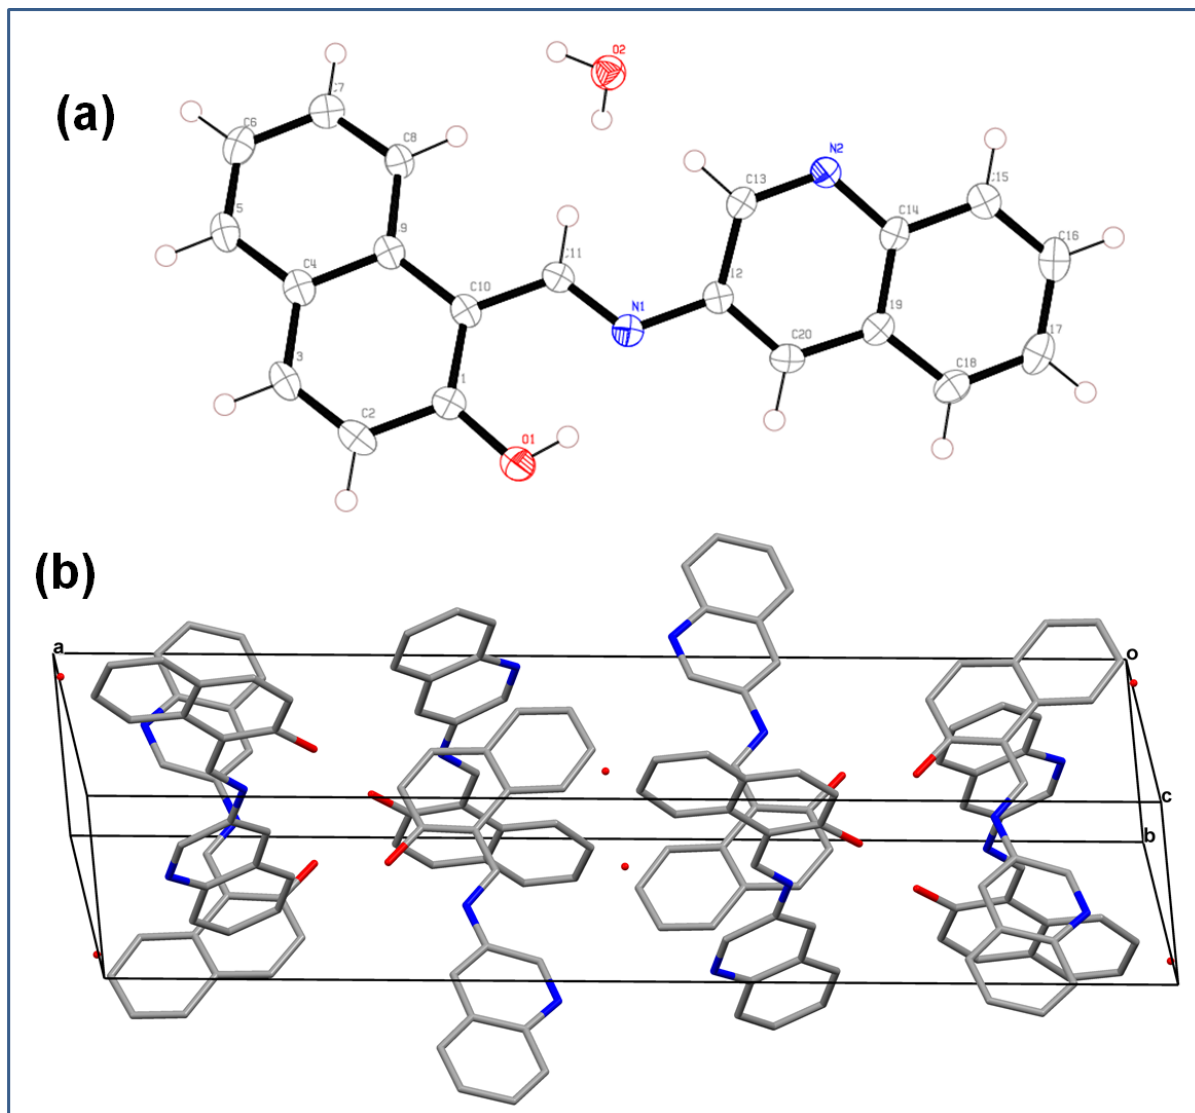

**Figure S7.** (a) An ORTEP view of the ligand L2•H<sub>2</sub>O with the atom numbering scheme. (b) Unit cell of L•H<sub>2</sub>O showing 8 molecules. The hydrogen atoms were removed for clarity.

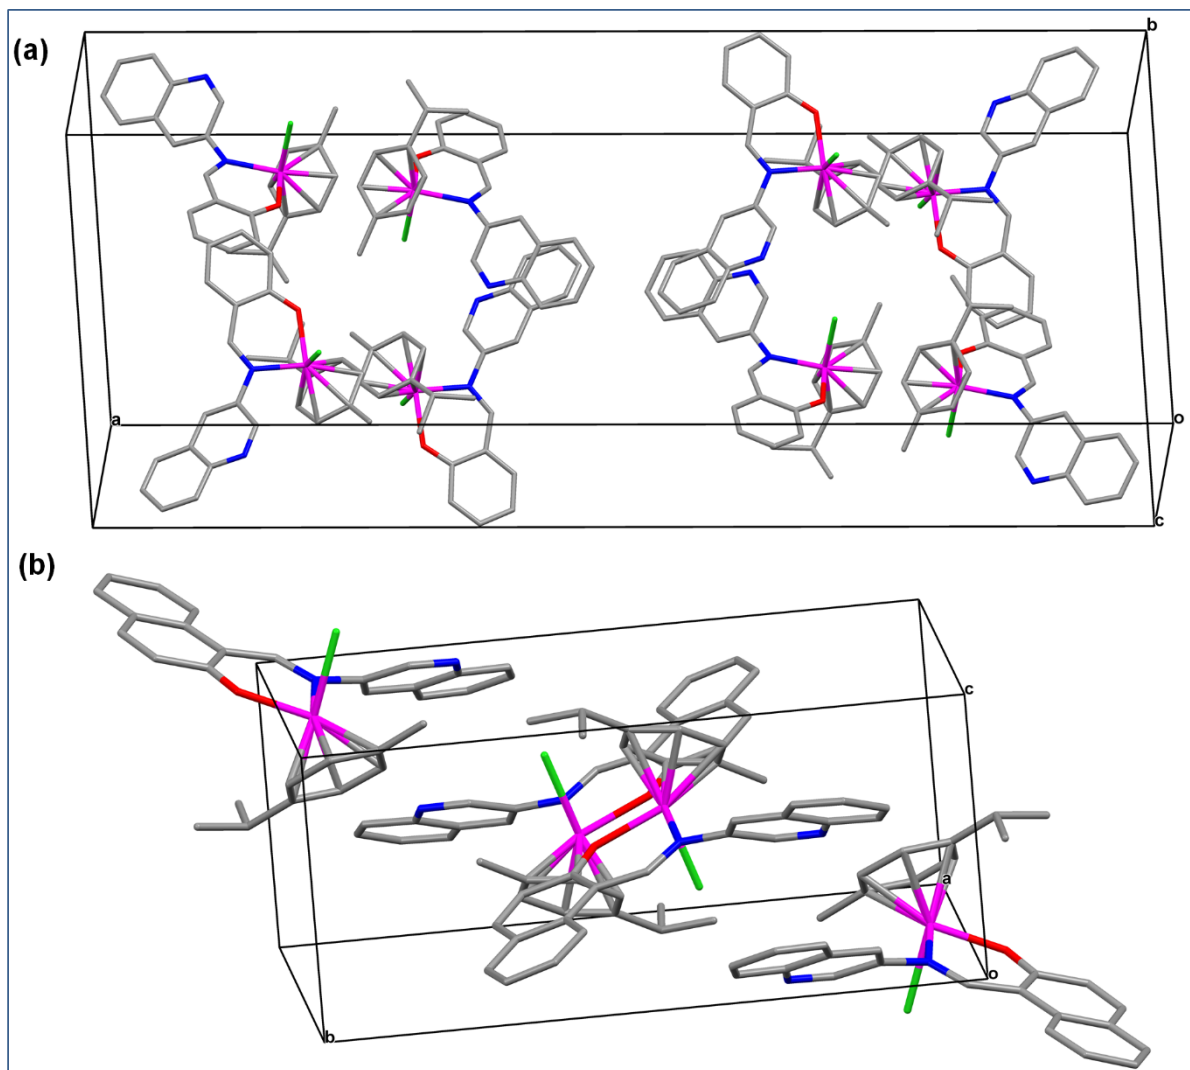

**Figure S8.** Unit cell of complexes **1** and **2** showing 8 and 4 molecules in respective unit cells. The hydrogen atoms were removed for clarity in the presentation.

**Table S1.** Selected crystallographic data and structure refinement parameters for the L2 and complexes **1** and **2**.

| Parameters                                       | L2                                                                | [Ru( $\eta^6$ - <i>p</i> -cymene)(L1)Cl] ( <b>1</b> )               | [Ru( $\eta^6$ - <i>p</i> -cymene)(L2)Cl] ( <b>2</b> )               |
|--------------------------------------------------|-------------------------------------------------------------------|---------------------------------------------------------------------|---------------------------------------------------------------------|
| Empirical formula                                | C <sub>40</sub> H <sub>30</sub> N <sub>4</sub> O <sub>3</sub>     | C <sub>26</sub> H <sub>25</sub> ClN <sub>2</sub> ORu                | C <sub>30</sub> H <sub>27</sub> ClN <sub>2</sub> ORu                |
| $M_r$                                            | 614.68                                                            | 518.00                                                              | 568.06                                                              |
| crystal system                                   | Monoclinic                                                        | Monoclinic                                                          | Monoclinic                                                          |
| space group                                      | <i>C2/c</i>                                                       | <i>C2/c</i>                                                         | <i>P2<sub>1</sub>/c</i>                                             |
| <i>a</i> (Å)                                     | 32.1158(18)                                                       | 39.725(2)                                                           | 20.1972(12)                                                         |
| <i>b</i> (Å)                                     | 4.7986(3)                                                         | 16.7767(9)                                                          | 17.0661(9)                                                          |
| <i>c</i> (Å)                                     | 22.4568(14)                                                       | 7.7208(4)                                                           | 7.6153(4)                                                           |
| $\alpha$ (deg)                                   | 90                                                                | 90                                                                  | 90                                                                  |
| $\beta$ (deg)                                    | 122.361(3)                                                        | 90.621(2)                                                           | 99.273(2)                                                           |
| $\gamma$ (deg)                                   | 90                                                                | 90                                                                  | 90                                                                  |
| Volume (Å <sup>3</sup> )                         | 2923.3(3)                                                         | 5145.2(5)                                                           | 2590.6(2)                                                           |
| <i>Z</i>                                         | 4                                                                 | 8                                                                   | 4                                                                   |
| $D_x$ (Mg m <sup>-3</sup> )                      | 1.397                                                             | 1.337                                                               | 1.456                                                               |
| $\mu$ (mm <sup>-1</sup> )                        | 0.090                                                             | 0.731                                                               | 0.734                                                               |
| <i>F</i> (000)                                   | 1288.0                                                            | 2112.0                                                              | 1160.0                                                              |
| <i>T</i> (K)                                     | 273.15                                                            | 273.15                                                              | 273.15                                                              |
| $2\theta$ range for data collection(deg)         | 5.188 to 50.098                                                   | 5.272 to 56.728                                                     | 4.774 to 56.726                                                     |
| Limiting indices                                 | -38 ≤ <i>h</i> ≤ 38,<br>-5 ≤ <i>k</i> ≤ 5,<br>-26 ≤ <i>l</i> ≤ 26 | -53 ≤ <i>h</i> ≤ 48,<br>-22 ≤ <i>k</i> ≤ 22,<br>-10 ≤ <i>l</i> ≤ 10 | -26 ≤ <i>h</i> ≤ 26,<br>-22 ≤ <i>k</i> ≤ 22,<br>-10 ≤ <i>l</i> ≤ 10 |
| Reflections collected                            | 16548                                                             | 25595                                                               | 25590                                                               |
| unique reflections                               | 2593                                                              | 6427                                                                | 6456                                                                |
| <i>R</i> (int)                                   | 0.0628                                                            | 0.0916                                                              | 0.0804                                                              |
| $T_{\max} / T_{\min}$                            | 0.746/0.631                                                       | 0.896/0.864                                                         | 0.746/0.655                                                         |
| Data/restraints/parameters                       | 2593/0/214                                                        | 6427/0/283                                                          | 6456/0/319                                                          |
| GOF on $F^2$                                     | 1.031                                                             | 1.028                                                               | 1.013                                                               |
| $R_1^a$ and $wR_2^b$<br>[ $I > 2\sigma(I)$ ]     | $R_1 = 0.0452$ , $wR_2 = 0.0964$                                  | $R_1 = 0.0597$ , $wR_2 = 0.1223$                                    | $R_1 = 0.0536$ , $wR_2 = 0.1025$                                    |
| $R_1$ and $wR_2$ (all data)                      | $R_1 = 0.0792$ , $wR_2 = 0.1092$                                  | $R_1 = 0.1057$ , $wR_2 = 0.1369$                                    | $R_1 = 0.0932$ , $wR_2 = 0.1136$                                    |
| Largest diff. peak/<br>hole (e.Å <sup>-3</sup> ) | 0.18/-0.27                                                        | 1.39/-0.64                                                          | 1.10/-0.54                                                          |
| CCDC deposition<br>serial number                 | 2006009                                                           | 2006007                                                             | 2006008                                                             |

<sup>a</sup> $R_1 = \Sigma||F_o| - |F_c|| / \Sigma|F_o|$ ; <sup>b</sup> $wR_2 = \{\Sigma[w(F_o^2 - F_c^2)^2] / \Sigma[w(F_o^2)^2]\}^{1/2}$ . Goodness-of-fit (GOF) =  $\{\Sigma[w(F_o^2 - F_c^2)^2] / (n-p)\}^{1/2}$ , where *n* = number of data and *p* = number of parameters refined

**Table S2** Selected bond length and bond angle parameter for the complexes **1** and **2**.

| Bond lengths (Å) (1)     |            | Bond lengths (Å) (2)     |            |
|--------------------------|------------|--------------------------|------------|
| Ru1-Cl1                  | 2.4285(10) | Ru1-Cl1                  | 2.4243(9)  |
| Ru1-O1                   | 2.078(3)   | Ru1-O1                   | 2.059(2)   |
| Ru1-N1                   | 2.097(4)   | Ru1-N1                   | 2.096(3)   |
| Ru1-C20                  | 2.185(4)   | Ru1-C27                  | 2.194(4)   |
| Ru1-C18                  | 2.210(4)   | Ru1-C26                  | 2.171(3)   |
| Ru1-C22                  | 2.175(4)   | Ru1-C22                  | 2.205(3)   |
| Ru1-C23                  | 2.184(4)   | Ru1-C23                  | 2.193(3)   |
| Ru1-C19                  | 2.192(4)   | Ru1-C25                  | 2.197(3)   |
| Ru1-C21                  | 2.209(4)   | Ru1-C24                  | 2.172(3)   |
| <b>Bond Angles (deg)</b> |            | <b>Bond Angles (deg)</b> |            |
| O1-Ru1-Cl1               | 85.55(8)   | O1-Ru1-Cl1               | 84.86(7)   |
| O1-Ru1-N1                | 87.92(13)  | O1-Ru1-N1                | 86.60(10)  |
| O1-Ru1-C20               | 128.23(14) | O1-Ru1-C27               | 106.74(12) |
| O1-Ru1-C18               | 140.77(14) | O1-Ru1-C26               | 86.56(11)  |
| O1-Ru1-C22               | 85.73(14)  | O1-Ru1-C22               | 142.99(12) |
| O1-Ru1-C23               | 104.78(14) | O1-Ru1-C23               | 163.05(11) |
| O1-Ru1-C19               | 163.59(14) | O1-Ru1-C25               | 94.67(11)  |
| O1-Ru1-C21               | 95.25(14)  | O1-Ru1-C24               | 127.05(12) |
| N1-Ru1-Cl1               | 84.93(10)  | N1-Ru1-Cl1               | 85.10(8)   |
| N1-Ru1-C20               | 91.32(15)  | N1-Ru1-C27               | 166.65(12) |
| N1-Ru1-C18               | 130.06(15) | N1-Ru1-C26               | 147.81(12) |
| N1-Ru1-C22               | 146.05(15) | N1-Ru1-C22               | 129.14(12) |
| N1-Ru1-C23               | 167.26(15) | N1-Ru1-C23               | 99.91(12)  |
| N1-Ru1-C19               | 100.25(15) | N1-Ru1-C25               | 111.56(12) |
| N1-Ru1-C21               | 110.02(15) | N1-Ru1-C24               | 92.02(12)  |
| C20-Ru1-Cl1              | 145.92(12) | C27-Ru1-Cl1              | 95.39(10)  |

|             |            |             |            |
|-------------|------------|-------------|------------|
| C20-Ru1-C18 | 68.49(16)  | C27-Ru1-C22 | 37.69(13)  |
| C20-Ru1-C19 | 38.27(16)  | C27-Ru1-C25 | 68.71(14)  |
| C20-Ru1-C21 | 37.60(15)  | C26-Ru1-C11 | 125.48(10) |
| C18-Ru1-C11 | 88.26(11)  | C26-Ru1-C27 | 37.50(13)  |
| C22-Ru1-C11 | 127.62(11) | C26-Ru1-C22 | 67.91(13)  |
| C22-Ru1-C20 | 67.34(16)  | C26-Ru1-C23 | 79.59(13)  |
| C22-Ru1-C18 | 67.90(16)  | C26-Ru1-C25 | 37.99(13)  |
| C22-Ru1-C23 | 37.27(15)  | C26-Ru1-C24 | 67.70(13)  |
| C22-Ru1-C19 | 79.54(16)  | C22-Ru1-C11 | 88.71(9)   |
| C22-Ru1-C21 | 37.88(15)  | C23-Ru1-C11 | 111.14(9)  |
| C23-Ru1-C11 | 96.89(11)  | C23-Ru1-C27 | 67.42(13)  |
| C23-Ru1-C20 | 80.08(16)  | C23-Ru1-C22 | 37.48(13)  |
| C23-Ru1-C18 | 37.78(15)  | C23-Ru1-C25 | 68.39(13)  |
| C23-Ru1-C19 | 67.21(16)  | C25-Ru1-C11 | 163.30(10) |
| C23-Ru1-C21 | 68.42(16)  | C25-Ru1-C22 | 81.62(13)  |
| C19-Ru1-C11 | 109.18(11) | C24-Ru1-C11 | 147.81(10) |
| C19-Ru1-C18 | 37.23(15)  | C24-Ru1-C27 | 80.44(13)  |
| C19-Ru1-C21 | 68.62(15)  | C24-Ru1-C22 | 68.43(13)  |
| C21-Ru1-C11 | 165.04(12) | C24-Ru1-C23 | 37.82(13)  |
| C21-Ru1-C18 | 81.66(15)  | C24-Ru1-C25 | 37.85(13)  |

---

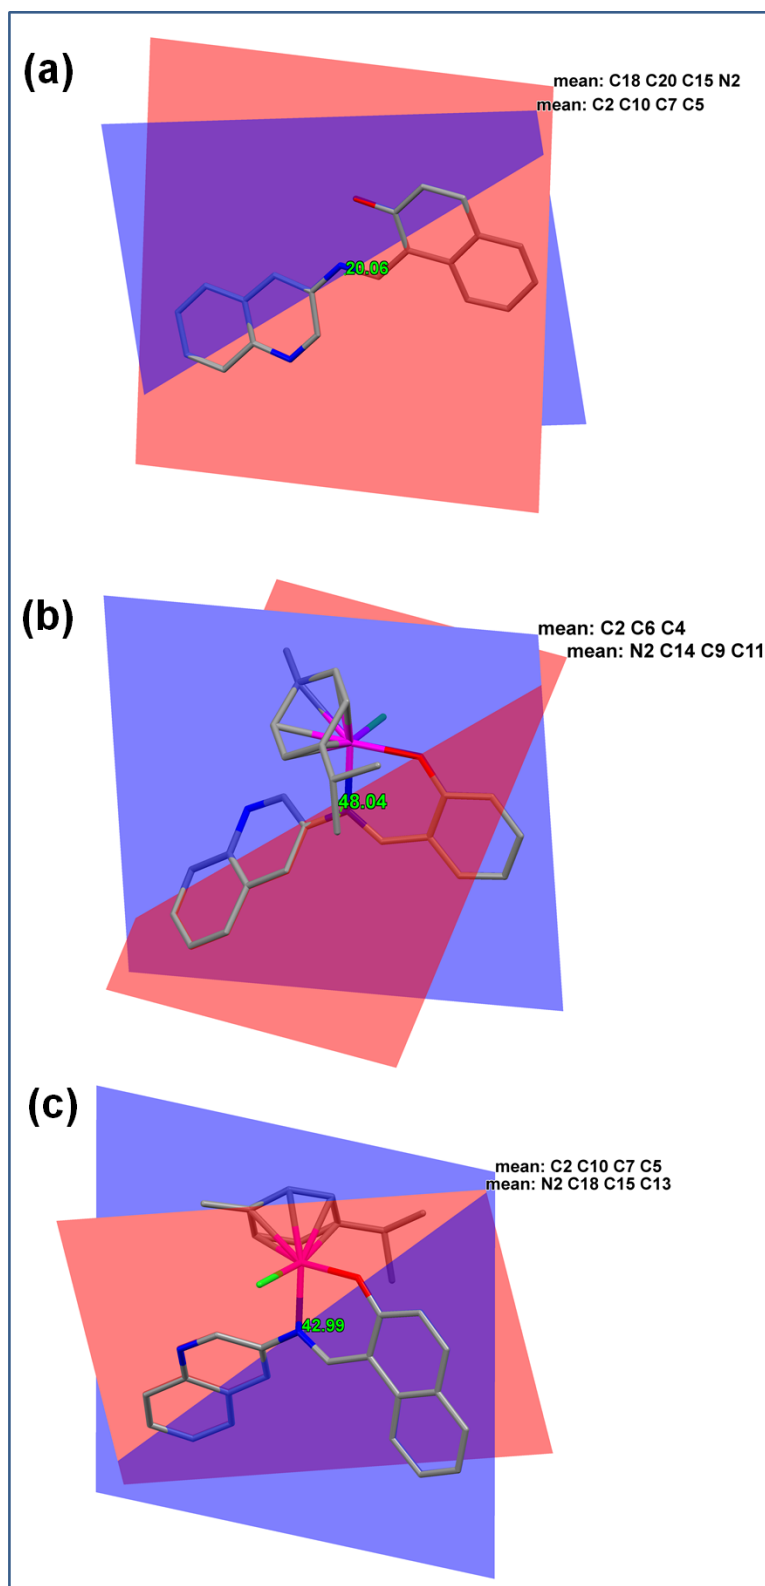

**Figure S9.** Representation of the dihedral angles (a) between the planes containing [C18 C20 C15 N2] and [C2 C10 C7 C5] atoms of L2 (b) between the planes carrying [N2 C14 C9 C11] and [C2 C6 C4] atoms of complex **1**, and (c) between the planes containing [N2 C18 C15 C13] and [C2 C10 C7 C5] atoms of complex **2**.

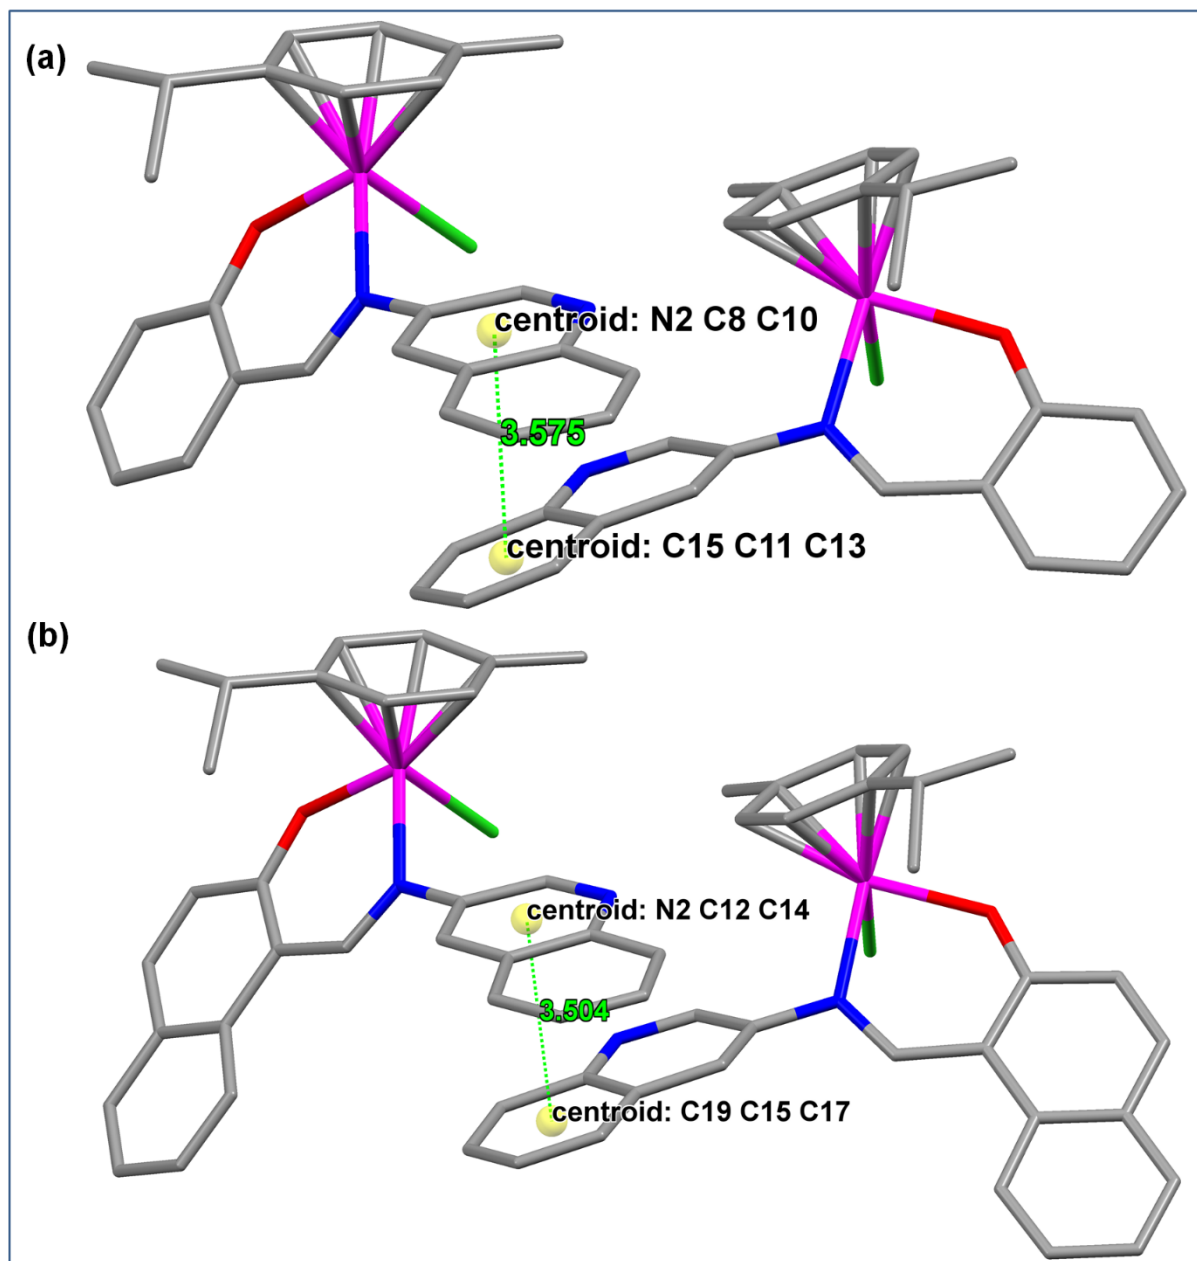

**Figure S10.** Intermolecular  $\pi$ - $\pi$  stacking interaction between quinoline rings of the complexes (a) **1** and (b) **2**.

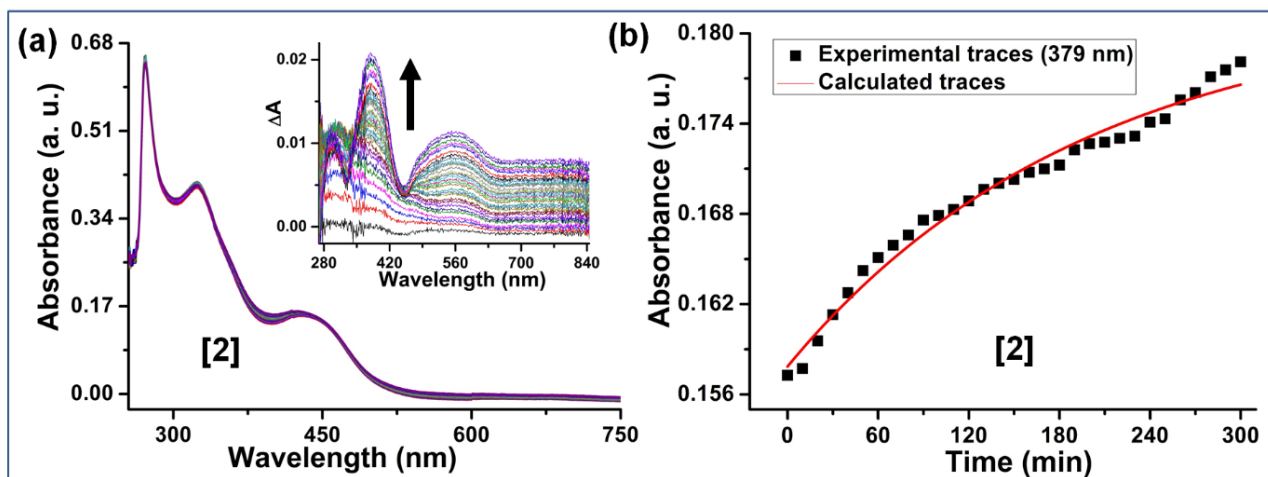

**Figure S11.** (a) The changes in absorption spectral profile for the complex **2** ( $39 \mu\text{M}$ ) in 5 mM tris HCl-NaCl buffer ( $\text{pH} = 7.2$ )-DMF mixture (1: 1) at 298 K. Inset: Evolution of UV-visible difference spectra upon aquation of complex **2**. (b) Absorption traces at 379 nm and mono-exponential fit upon hydrolysis for complex **2**.



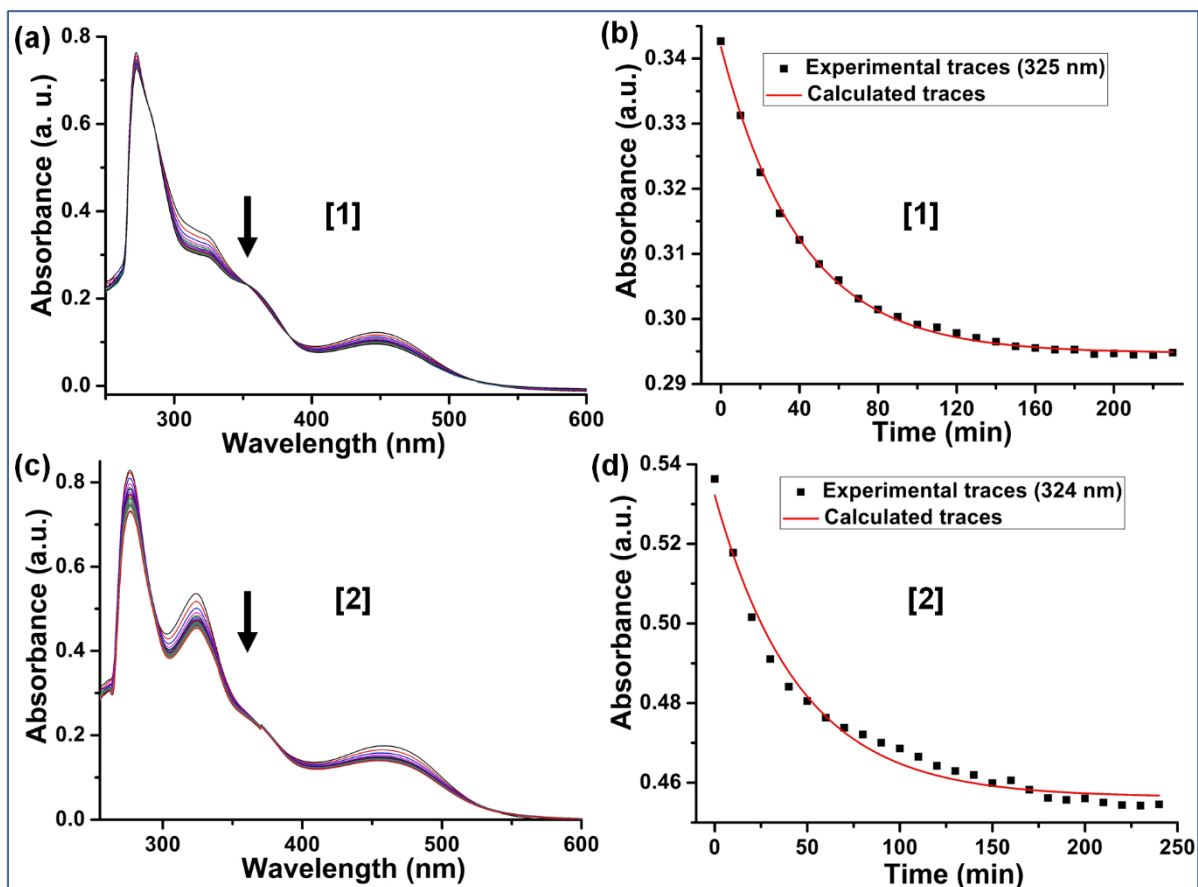

**Figure S12.** The changes in the absorption spectral profile of the complexes (a) **1** ( $39 \mu\text{M}$ ) and (c) **2** ( $39 \mu\text{M}$ ) in DMF. (b) The changes in absorbance at 325 nm (**1**) as a function of time with their mono-exponential fit. (d) The changes in absorbance at 324 nm (**2**) as a function of time with their mono-exponential fit.

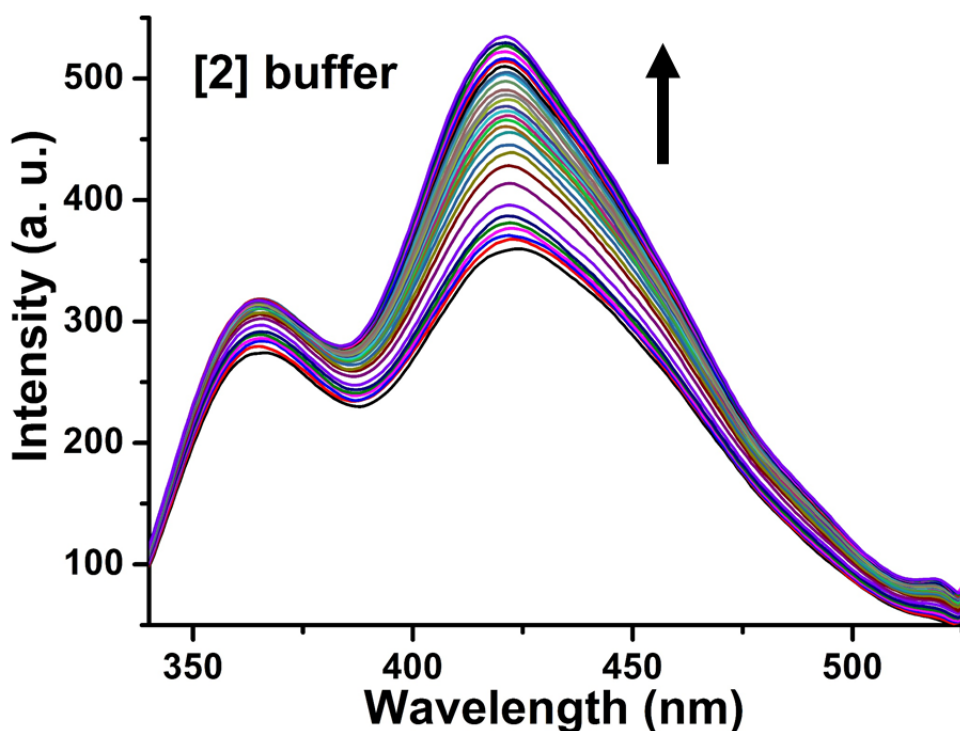

**Figure S13.** The time-dependent changes in fluorescence spectral profile for the complex **2** (10  $\mu\text{M}$ ) in 5 mM Tris HCl/NaCl buffer (pH = 7.2)-DMF mixture (200:1).

**Table S3.** The photochemical results of complexes **1** and **2** upon photo-irradiation of UV-A light ( $\lambda_{\text{exc}} = 365 \text{ nm}$  and power = 6 W).

| Complex  | <sup>a</sup> $K \text{ (s}^{-1}\text{)}$ | <sup>b</sup> $t_{1/2} \text{ (min)}$ |
|----------|------------------------------------------|--------------------------------------|
| <b>1</b> | $(7.96 \pm 0.46) \times 10^{-4}$         | 14.51                                |
| <b>2</b> | $(6.79 \pm 0.59) \times 10^{-4}$         | 17.01                                |

<sup>a</sup>First-order rate constant of photochemical changes determined from monoexponential curve fitting with  $R^2 = 0.99$  for both the complexes **1** and **2**. <sup>b</sup>Half-lifetime for the photo-induced product formation.

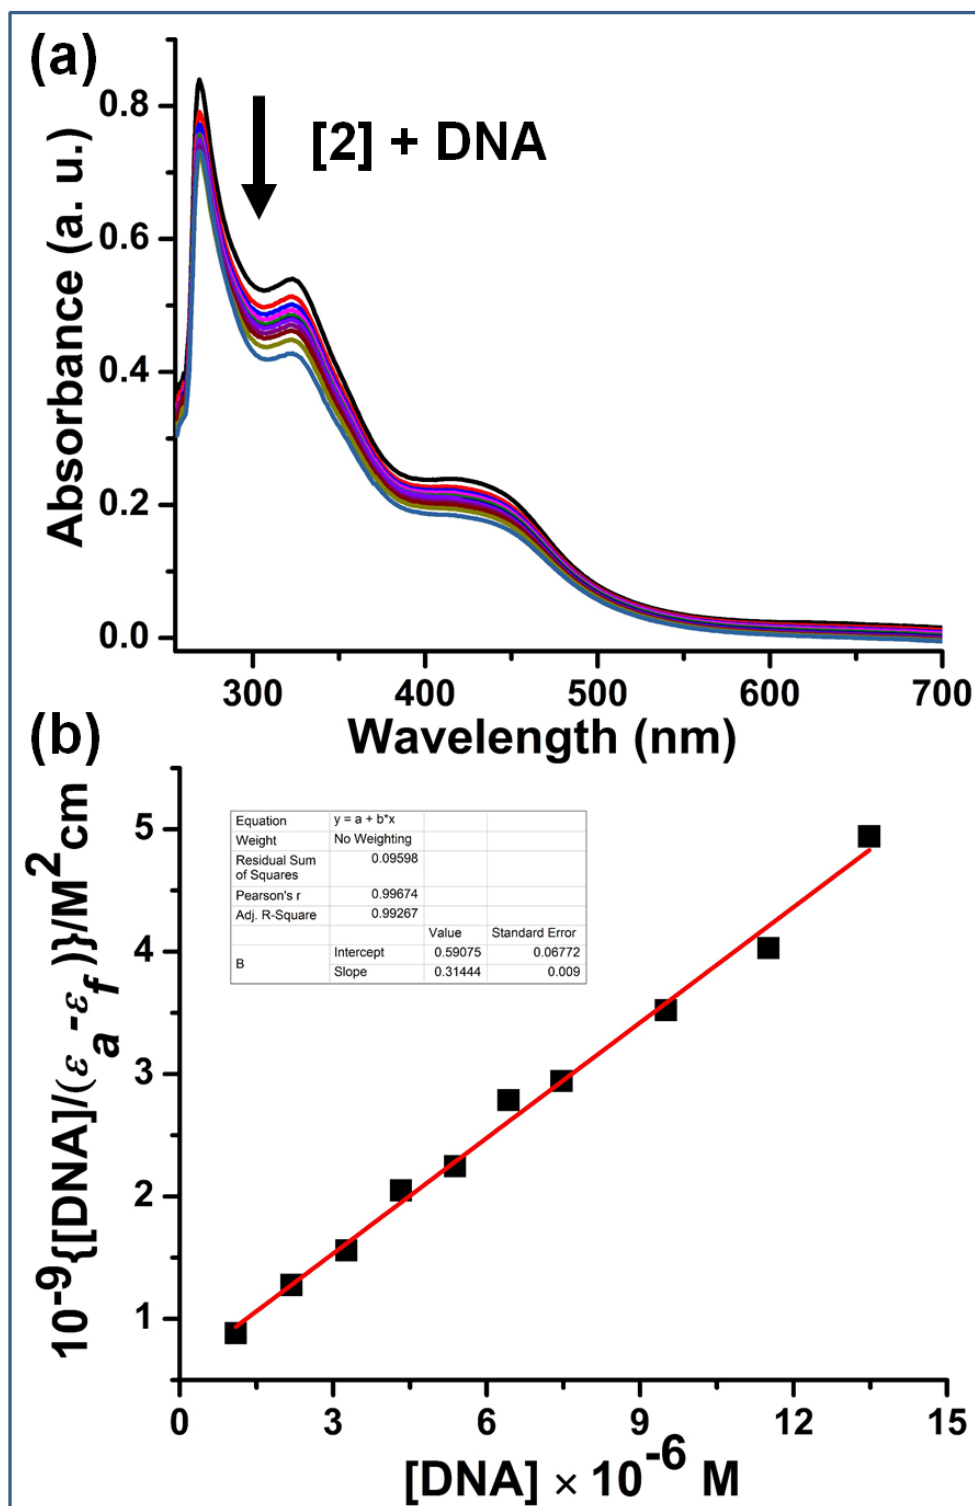

**Figure S14.** The binding propensity of the complexes with CT-DNA. (a) The continuous decrease of absorbance of complex 2 ( $39 \mu\text{M}$ ) upon gradual addition of CT-DNA ( $0\text{--}15 \mu\text{M}$ ) in  $5 \text{ mM}$  Tris HCl-NaCl buffer ( $\text{pH} = 7.2$ )-DMF mixture ( $50: 1$ ). (b) Determination of binding constant ( $K_b$ ) of complex 2 with CT-DNA from the slope to intercept ratio of a linear fitted plot of  $[\text{DNA}]$  vs  $\text{DNA}/\epsilon_a - \epsilon_f$  from equation (3).

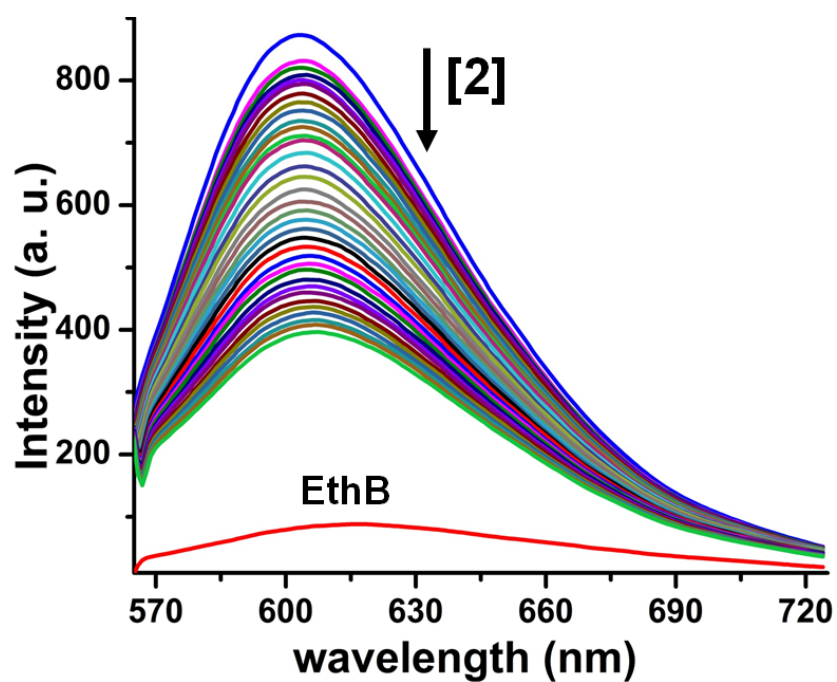

**Figure S15.** The decrease of emission intensity of EthB ( $12.5 \mu\text{M}$ ) bound CT-DNA ( $10 \mu\text{M}$ ) upon addition of complex 2 ( $0\text{--}236 \mu\text{M}$ ),  $\lambda_{\text{ex}} = 546 \text{ nm}$ , Ex and Em slit width = 10 nm.

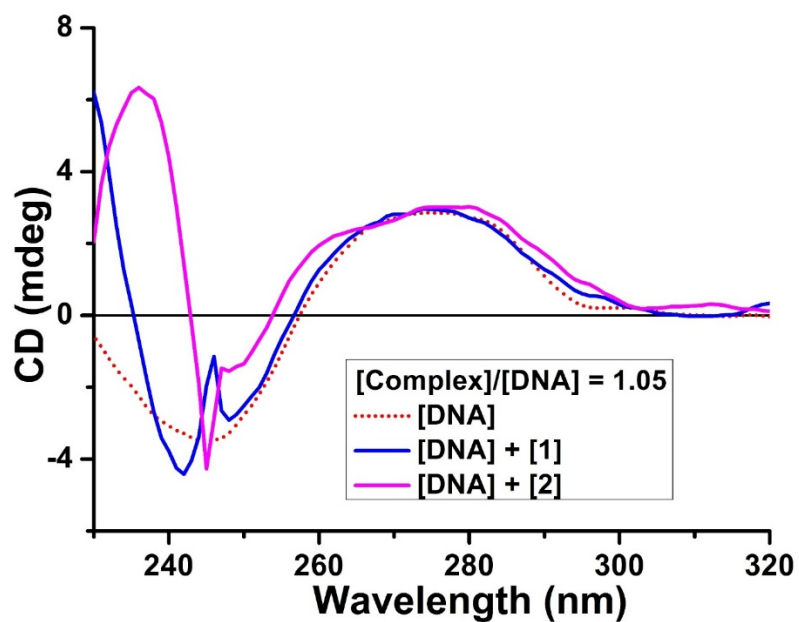

**Figure S16.** An overlay of circular dichroism spectra of CT-DNA ( $225 \mu\text{M}$ ) and induced CD signals from the complexes 1 and 2.

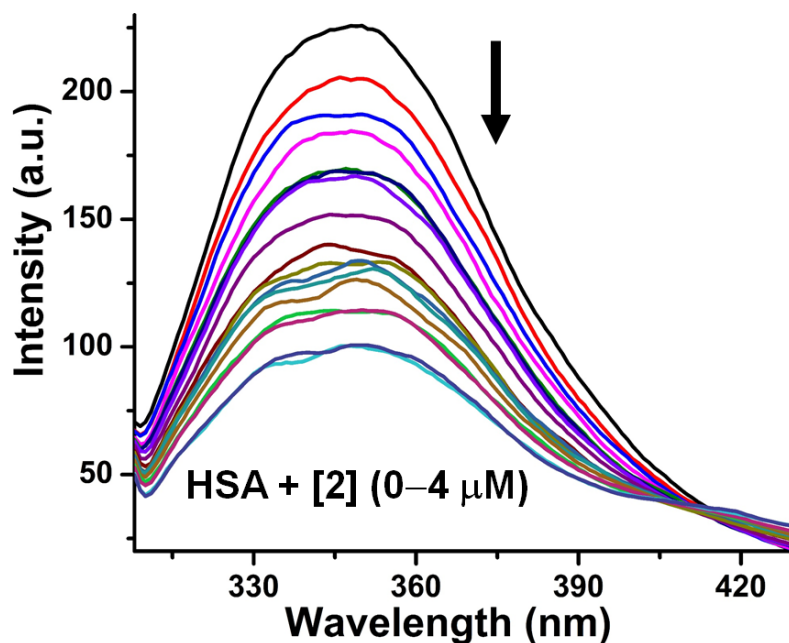

**Figure S17.** The result of the binding of the complexes with protein HSA. (a) The quenching of emission intensity of HSA ( $2.4 \mu\text{M}$ ) in absence and in presence of increasing concentration complex **2** ( $0\text{--}4 \mu\text{M}$ ) in 0.8% DMF-5mM Tris-HCl/NaCl buffer (pH 7.2) mixture,  $\lambda_{\text{exc}} = 295 \text{ nm}$ ,  $\lambda_{\text{em}} = 350 \text{ nm}$ , slit 10/5 nm.

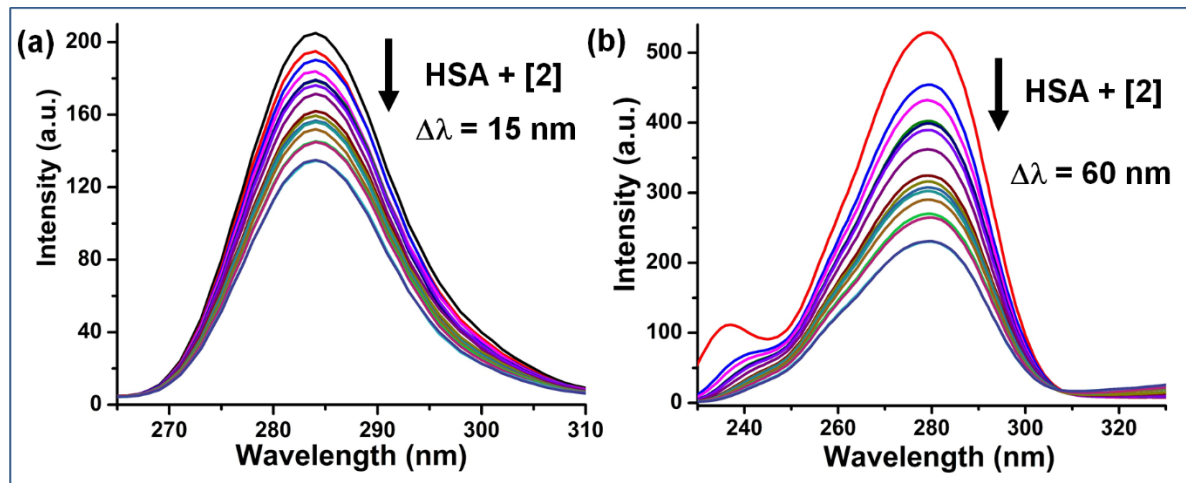

**Figure S18.** The synchronous fluorescence measurement of HSA ( $2.4 \mu\text{M}$ ) upon addition of complex **2** ( $0\text{--}4 \mu\text{M}$ ) in 0.8% DMF-5mM Tris-HCl/NaCl buffer (pH 7.2) mixture at 298 K. (a) Spectral traces of the HSA upon titration with complex **2** for  $\Delta\lambda = 15 \text{ nm}$ . (b) Spectral traces of the HSA upon titration with complex **2** for  $\Delta\lambda = 60 \text{ nm}$ , Slit width for exc/em = 10/5 nm.
